# Supplementary material for: Solvent-free electrically conductive Ag/ethylene vinyl acetate (EVA) composites for paper-based printable electronics
Source: Royal Society of Chemistry journal article supplement (doi:10.1039/c9ra02593f), 2019-01-01
Supplement: c9ra02593f1.pdf [file c9ra02593f1.pdf]

## Supporting information

### **Solvent-free electrically conductive Ag/ethylene vinyl acetate (EVA) composites for paper-based printable electronics**

Yuqiu Shen,<sup>1</sup> Zhenxing Chen,<sup>1,2\*</sup> Yong Zhou,<sup>1</sup> Zuomin Lei,<sup>1</sup> Yi Liu,<sup>1</sup> Wenchao Feng,<sup>1</sup> Zhuo Zhang,<sup>1</sup> and Houfu Chen<sup>1</sup>

*1. School of Chemical Engineering and Technology, Sun Yat-sen University, Tangjiawan, Zhuhai, 519082, P. R. China*

*2. The Key Laboratory of Low-Carbon Chemistry & Energy Conservation of Guangdong Province, Sun Yat-sen University, Guangzhou, 510275, P. R. China*

*\*Corresponding author: E-mail: 2764927916@qq.com, 3362104303@qq.com*

## **Experimental Section**

### **Weight percent selection of silver powders of solvent-free electrically conductive Ag/EVA composites**

The reason why the loading of silver flakes was fixed between 40-70 wt% is as follow: Once the silver loading of Ag/EVA composites was 35 wt%, the volume resistivity of as-prepared, FAgL 6500 and FAgL6501 reached  $0.82 \Omega \cdot \text{cm}$ ,  $16.8 \Omega \cdot \text{cm}$  and  $36.9 \Omega \cdot \text{cm}$ , respectively. The volume resistivity increases by three orders of magnitude when compare with the Ag/EVA composites with the loading of 40 wt%. When the loading of silver surpass 70 wt%, electrical conductivity continues to deteriorate; furthermore, the production costs of them have been greatly raised; thirdly, the stirring of Ag/EVA composites becomes much more difficult; finally, the mechanical property of cured film of Ag/EVA composites deteriorate. Considering the electrical conductivity, mechanical property and production cost, the Ag/EVA composites filling with 40-70 wt% silver powders are chosen as the research subject. The electrical percolation of the three Ag/EVA composites are different, The electrical percolation of Ag/EVA composites filling with as-prepared flaky silver powders is around 25 wt%, of FAgL6500 and FAgL 6501 is about 30 wt%.

**Table S1** The conversion relationship between weight fraction and volume fraction of solvent-free electrically conductive Ag/ethylene vinyl acetate (EVA) composites filling with different silver powders.

| Name        | Tap density (g/cm <sup>3</sup> ) | Weight percent (wt %) | Volume fraction (vol%) |
|-------------|----------------------------------|-----------------------|------------------------|
| As-prepared | 4.3                              | 40.0                  | 13.4                   |
|             |                                  | 45.0                  | 16.0                   |
|             |                                  | 50.0                  | 18.9                   |
|             |                                  | 55.0                  | 22.1                   |
|             |                                  | 60.0                  | 25.9                   |
|             |                                  | 65.0                  | 30.2                   |
| FAgL 6500   | 3.0                              | 70.0                  | 35.2                   |
|             |                                  | 40.0                  | 18.2                   |
|             |                                  | 45.0                  | 21.4                   |
|             |                                  | 50.0                  | 25.0                   |
|             |                                  | 55.0                  | 28.9                   |
|             |                                  | 60.0                  | 33.3                   |
| FAgL6501    | 4.8                              | 65.0                  | 38.2                   |
|             |                                  | 70.0                  | 43.7                   |
|             |                                  | 40.0                  | 12.2                   |
|             |                                  | 45.0                  | 14.6                   |
|             |                                  | 50.0                  | 17.2                   |
|             |                                  | 55.0                  | 20.3                   |
|             |                                  | 60.0                  | 23.8                   |
|             |                                  | 65.0                  | 27.9                   |
|             |                                  | 70.0                  | 32.7                   |

Note: The density of EVA is 1.0 g/cm<sup>3</sup>.

## Morphology of solvent-free electrically conductive Ag/EVA composites

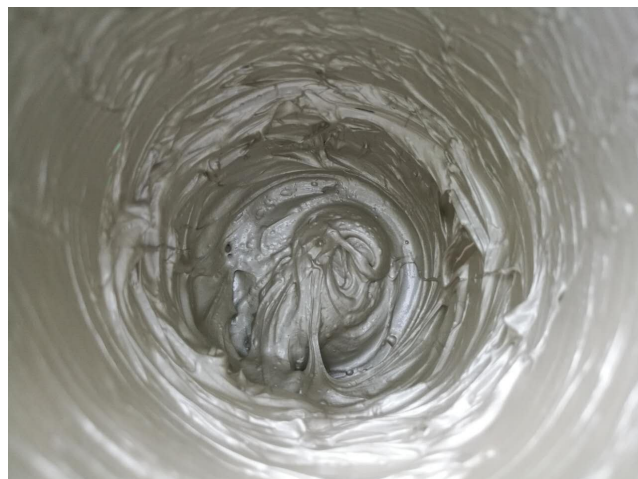

**Figure S1.** Optical images of solvent-free electrically conductive Ag/EVA composites (filled with 55wt% as-prepared flake silver powders)

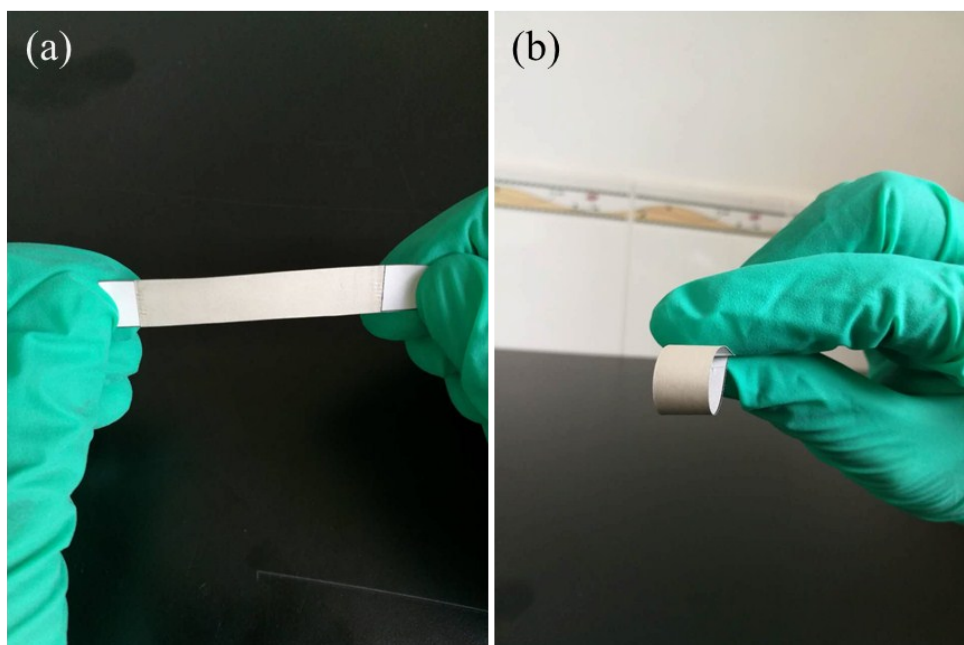

**Figure S2** Cured conductive films of solvent-free electrically conductive Ag/EVA composites (55 wt% Ag) filling with as-prepared flake silver powders.

## SEM micrographs of cured conductive films

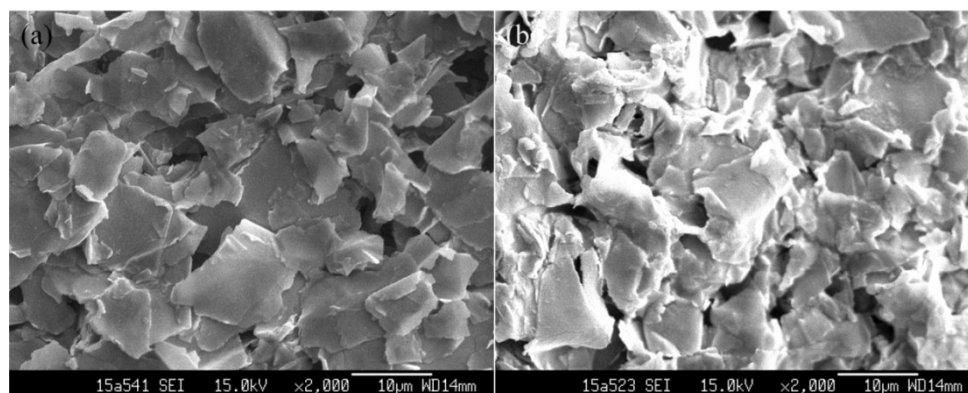

**Figure S3** SEM of solvent-free electrically conductive Ag/EVA composites filled with as-prepared flake silver powder (a) 55 wt% Ag (b) 65 wt% Ag.

## XRD analysis

X-ray diffraction was carried out to study the crystalline structures of the home-made and commercial silver powders. Figure S4 shows all the samples have four characteristic peaks for crystalline metallic silver at about  $38.1^\circ$ ,  $44.5^\circ$ ,  $64.5^\circ$ ,  $77.4^\circ$  corresponding to the Bragg's reflection indices of (111), (200), (220), and (311) planes in a fcc structure, proving that all the silver powders haven't been oxidized.

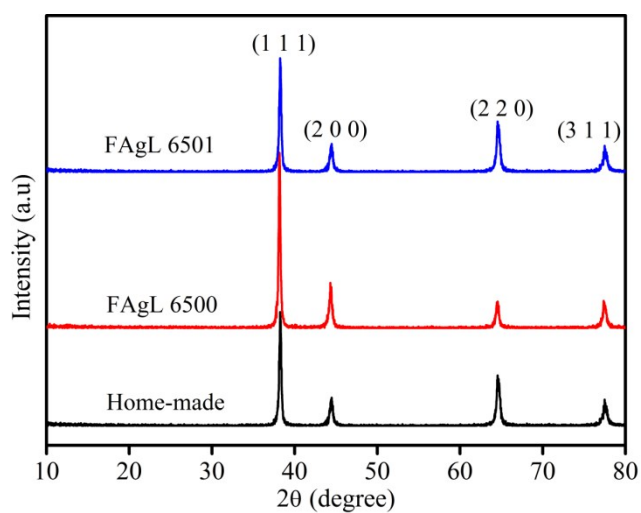

**Figure S4** X-ray diffraction (XRD) patterns of flake Ag powders.

## ATR-FTIR of paper substrate

It was observed that the peak at  $880\text{ cm}^{-1}$  was assigned to C-H bending vibrations of glycosidic linkage.<sup>1</sup> The peak at  $1055\text{ cm}^{-1}$  can be corresponded to the C-O stretch of glucose ring. The peak at  $1110$  and  $1160\text{ cm}^{-1}$  which could be associated to the -C-O-C- asymmetric stretch and vibration of glucose ring stretch in cellulose.<sup>2</sup> The Shoulder peak at  $1343$  and  $1413\text{ cm}^{-1}$  were assigned to the asymmetric  $\text{CH}_2$  bending and wagging.<sup>3</sup> The band appearing at  $1632\text{ cm}^{-1}$  can be assigned to the conjugated C=O. The small peak which appeared at  $1730\text{ cm}^{-1}$  can be attributed to the -C-O- stretching of the cellulose.<sup>4</sup> The band at  $2902\text{ cm}^{-1}$  appeared due to C-H stretching in cellulose. The band at  $3345\text{ cm}^{-1}$  can be ascribed to the stretching of H-bonded of -OH groups.<sup>5</sup>

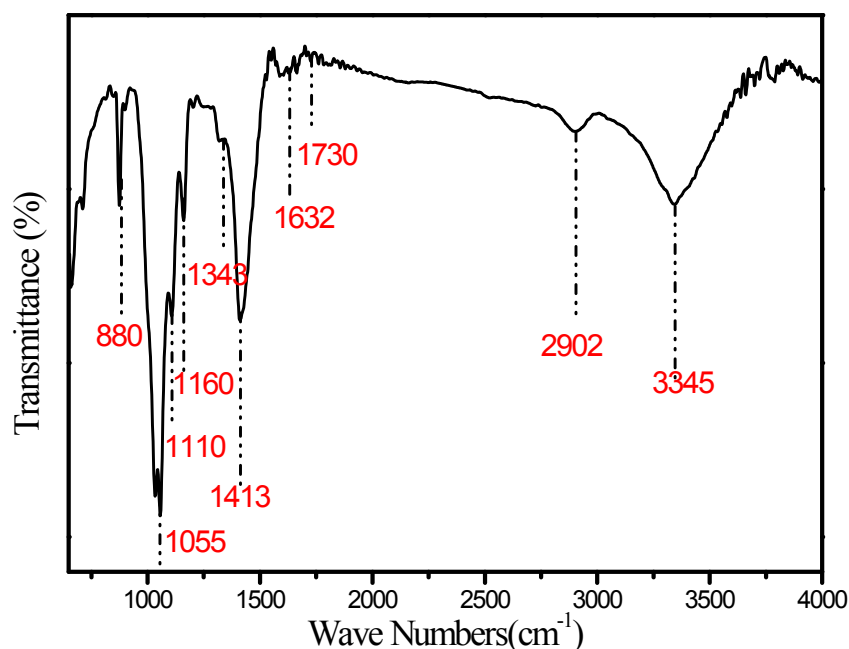

**Figure S5** ATR-FTIR spectroscopy of paper substrate.

## Adhesion test

From Figure S6(c) we can see that no noticeable conductive films were removed by the tape, a 5B level of adhesion strength was obtained. This can be ascribed to the excellent bonding of the conductive Ag/resin composites towards the paper substrate.

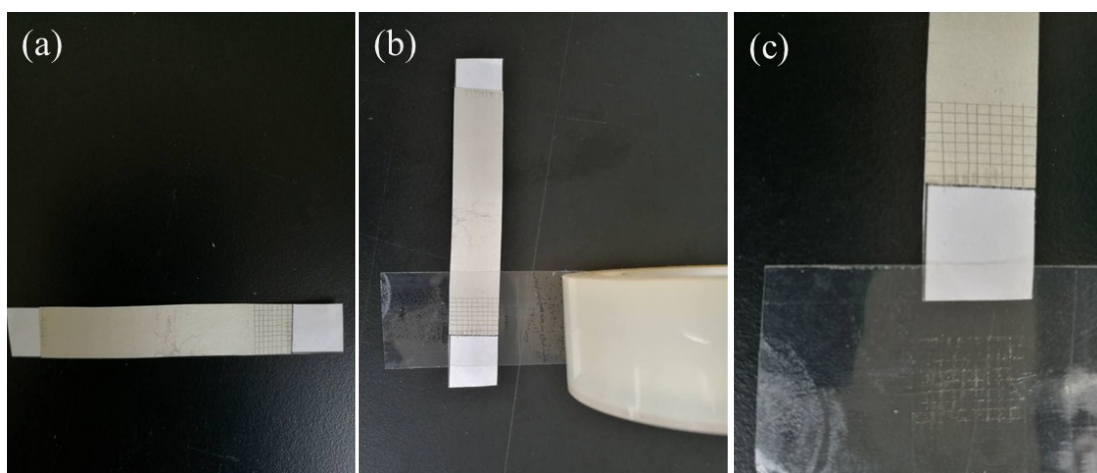

**Figure S6** Optical images of (a) cured Ag/EVA conductive film after crosshatched; (b) the adhesion of conductive Ag/EVA film was testing by Scotch tape (3M); (c) the 3M tape after removed from the conductive film.



## References

1. K. Pandey, *J. Appl. Polym. Sci.*, 1999, **71**, 1969.
2. M. Kacurakova, P. Capek, V. Sasinkova, N. Wellner and A. Ebringerova, *Carbohydr. Polym.*, 2000, **43(2)**, 200.
3. D. Oldak and H. Kaczmarek, *J. Mater. Sci.*, 2005, **40**, 4192.
4. C. Cao, Z.L. Yang, L.J. Han, X.P. Jiang and G.Y. Ji, *Cellulose*, 2015, **22**, 148.
5. K. Das, D. Ray, N. R. Bandyopadhyay and S. Sengupta, *J. Polym. Environ.* 2010, **18**, 360.
6. A. Nawrocka, M. Krekora, Z. Niewiadomski and A. Miś, *Food Hydrocolloids*, 2018, **85**, 182.
